# Supplementary material for: Residue Levels of Organochlorine Pesticides in Breast Milk and Its Associations with Cord Blood Thyroid Hormones and the Offspring’s Neurodevelopment
Source: PubMed Central journal article supplement (PMC6517872; doi:10.3390/ijerph16081438), 2019-04-23
Supplement: ijerph-16-01438-s001.pdf [file ijerph-16-01438-s001.pdf]

## **Residue levels of organochlorine pesticides in breast milk and its associations with cord blood thyroid hormones and the offspring's neurodevelopment**

**Table S1.** The descriptive analysis in our participants ( $n = 55$ ).

**Table S2.** Spearman's rho correlation coefficients ( $r$ ) between neurodevelopmental outcomes and birth outcomes ( $n = 55$ ).

**Table S3.** Spearman's rho correlation coefficients ( $r$ ) between cord blood hormone levels and birth outcomes ( $n = 55$ ).

**Table S4.** Spearman's rho correlation coefficients ( $r$ ) between neurodevelopmental outcomes and cord-blood hormone levels ( $n = 55$ ).

**Table S5.** OCP levels in breast milk in different countries.

### **The descriptive analysis of our participants**

Table S1 shows the descriptive analysis of our participants. **A total of 32 and 23 mothers from rural and urban areas and 56.4% of their female offspring (n=31) participated in this study, respectively. Variables including working status, occupational exposure to insecticides, smoking habit, and alcohol consumption, were expressed as the frequency and percentage. The percentage of mothers who are working was 45.5% while 100% of the participants did not have any occupational exposure to OCPs. As for the smoking and drinking habits, 5.45% of the participants were reported to be smoking while 3.64% were reported to be alcohol consumers.**

### **Associations between birth outcomes, cord blood hormones, and Bayley-III**

The correlations between the birth outcomes in our cohort, cord blood hormone levels, and Bayley-III composite scores were listed in Table S2 and S3.

### **Adjustment of Bayley-III scales**

The 5 domains of Bayley-III scales for our participants were examined using the chronological age, which is adjusted for child's prematurity by the infant psychometrists in the standard room located in Pingtung Christian Hospital. Prior to the test of Bayley-III scales in each participant, the infant psychometrist calculated the chronological age based on instruction from the handbook of Bayley-III®. Considering the over-adjustment in examining statistical analysis, we recognized that the child's age was adjusted before the Bayley-III. The child's gestational age was not considered as the covariate in performing the statistics.

### **Correlations between THs and IGF-1 and Bayley-III**

We examined the correlations between the neurodevelopmental outcomes and the cord-blood hormone levels. The three variables (TSH, IGF-1, and cognitive score) did not fit the normal distribution after normality was examined. The Spearman's rho correlation coefficient test was used to determine the relationships between neurodevelopmental outcomes and cord-blood hormone levels (Table S4). The result is shown below. Motor scores were positively and significantly correlated with cord blood T4, free T4, and

IGF-1, respectively. Adaptive behavioral scores had positive significant correlations with T4 and free T4 in cord blood.

Several studies have also reported the importance of thyroid and growth hormones in the infant neurodevelopment. Thyroid deficits such as undetected hypothyroidism in pregnant mothers have been reported to cause adverse effects on the neuropsychological development of the human fetus (Haddow et al. 1999). Henrichs et al. (2010) reported that hypothyroxinemia in pregnant women was associated with delays in both expressive language and nonverbal cognitive development during early childhood. A significant risk of developing impaired psychomotor development later on in childhood has been attributed to low maternal FT4 serum concentrations (Pop et al. 1999). Severe hypothyroidism has been correlated with reduced encoding and focus in adolescents (Rovet and Hepworth 2001). According to a study by Shelton et al. (2012), brain development requires adequate thyroid hormone levels in utero. Mental and/or psychomotor deficiencies have been linked to diminished maternal T4 levels (Zimmermann 2007). **Transient intrauterine thyroid hormones deficiencies for as little as three days can alter the cortical architecture, which results in interference with neuronal migration and the growth of Purkinje cells during critical gestation stages (Roman 2007).** Both characteristic defects have been observed in autism autopsy studies conducted by Fatemi et al. (2002) and Wegiel et al. (2010). In human fetuses, sufficient thyroid hormone production only starts during week 18 of gestation (Burrow et al. 1994). Thus, sufficient maternal thyroid hormones are important in the early fetal neurodevelopment stages, most specifically for the reelin-mediated migration of neurons (Pathak et al. 2011).

#### **The breastmilk levels of OCPs in Taiwan were within the safe criteria**

**The safe criteria of OCPs in breast milk were defined in the present study based on the recommendations of World Health Organization (WHO) and US Environmental Protection Agency (EPA). WHO recommended that the acceptable daily intake of DDTs was 20,000 ng/kg/day for a breastfed infant (WHO, 1986). The website of US EPA Integrated Risk Information System (IRIS) also provided a reference dose for oral exposure (RfD) for several OCP compounds for example: the RfD of DDT is  $5 \times 10^{-4}$  mg/kg/day (US EPA, 2019). The estimated median DDTs daily intake of 91.2 ng/kg/day for an exclusively breastfed infant was calculated based on assumption that a breastfed infant weighted 4 kg and consumed 699 g milk/day in the first month after delivery in the present study. Our values were extremely lower compared with WHO recommendation and RfDs listed in US EPA IRIS. We also listed several RfDs of OCPs from the IRIS website as the follows: methoxychlor of  $5 \times 10^{-3}$  and dieldrin of  $5 \times 10^{-5}$ .**

#### References

US EPA Integrated Risk Information System <https://www.epa.gov/iris> (Access Mar 30 2019)

WHO, 1986. Principles for evaluating health risks from chemicals during infancy and early childhood: the need for a special approach. Environmental Health Criteria, 59. WHO, Geneva.

#### **Breast milk levels of OCPs in different countries**

The breastmilk levels of OCPs in Taiwan were within the safe criteria. Our OCP levels detected in the breast milk samples collected between 2007 and 2010 were observed to be lower than the reports from Korea (Lee et al. 2013), Vietnam (Minh et al. 2004), China (Zhou et al. 2012), and Japan (Haraguchi et al. 2009), and Russia (Mamontova et al. 2017) with comparable sampling years. Breastmilk OCP levels in our research were similar magnitudes with the Chinese study (Zhou et al. 2012) (Table S5).

**Table S1.** The descriptive analysis in our participants.

| Variables                                    | Frequency (number) | Percentage (%) |
|----------------------------------------------|--------------------|----------------|
| <u>Residence area</u>                        |                    |                |
| Urban area                                   | 23                 | 43.6           |
| Rural area                                   | 32                 | 56.4           |
| <u>Working status and type</u>               |                    |                |
| No job                                       | 25                 | 45.5           |
| Having job                                   | 30                 | 54.5           |
| Teachers and employees in school             | 9                  | 30.0           |
| Medical staff                                | 6                  | 20.0           |
| Employees in factory                         | 4                  | 13.3           |
| Employees in service industry                | 5                  | 16.7           |
| Employees in business                        | 3                  | 10.0           |
| Others                                       | 3                  | 10.0           |
| <u>Occupational exposure of insecticides</u> |                    |                |
| NO                                           | 55                 | 100            |
| Yes                                          | 0                  | 0              |
| <u>Smoking habit</u>                         |                    |                |
| NO                                           | 52                 | 94.5           |
| Yes                                          | 3                  | 5.45           |
| <u>Drinking habit</u>                        |                    |                |
| NO                                           | 53                 | 96.4           |
| Yes                                          | 2                  | 3.64           |

**Table S2** Spearman's rho correlation coefficients (r) between neurodevelopmental outcomes and birth outcomes (n=55).

| Bayley-III          | <u>Infant's birth outcomes</u> |              |                    |                     |
|---------------------|--------------------------------|--------------|--------------------|---------------------|
|                     | Birth weight                   | Birth length | Head circumference | Chest circumference |
| Cognitive           | 0.178                          | 0.151        | -0.163             | 0.077               |
| Language            | 0.179                          | 0.089        | 0.093              | 0.208               |
| Motor               | 0.342**                        | 0.535        | 0.113              | 0.209               |
| Social emotional    | 0.168                          | 0.265*       | 0.126              | -0.024              |
| Adaptive behavioral | 0.294*                         | 0.396**      | 0.057              | 0.132               |

\* $p < 0.05$ , \*\* $p < 0.01$ , \*\*\* $p < 0.001$ .**Table S3.** Spearman's rho correlation coefficients (r) between cord blood hormone levels and birth outcomes (n=55).

| Bayley-III     | <u>Infant's birth outcomes</u> |              |                    |                     |
|----------------|--------------------------------|--------------|--------------------|---------------------|
|                | Birth weight                   | Birth length | Head circumference | Chest circumference |
| Cord blood T3  | -0.152                         | -0.130       | -0.216             | -0.188              |
| Cord blood T4  | 0.188                          | 0.095        | 0.183              | 0.094               |
| Cord blood TSH | -0.123                         | -0.008       | -0.014             | -0.135              |
| Cord blood FT3 | -0.111                         | -0.017       | -0.117             | -0.040              |
| Cord blood FT4 | 0.335*                         | 0.290*       | 0.239              | 0.164               |

|                  |       |       |       |        |
|------------------|-------|-------|-------|--------|
| Cord blood IGF-1 | 0.160 | 0.175 | 0.136 | -0.023 |
|------------------|-------|-------|-------|--------|

\* $p < 0.05$ , \*\* $p < 0.01$ , \*\*\* $p < 0.001$ .

**Table S4** Spearman's rho correlation coefficients (r) between neurodevelopmental outcomes and cord-blood hormone levels (n=55).

| Bayley-III          | Cord blood hormones |        |       |         |         |         |
|---------------------|---------------------|--------|-------|---------|---------|---------|
|                     | T3                  | T4     | TSH   | Free T3 | Free T4 | IGF-1   |
| Cognitive           | -0.020              | 0.023  | 0.151 | -0.102  | 0.061   | 0.079   |
| Language            | -0.014              | 0.007  | 0.010 | 0.004   | 0.158   | -0.079  |
| Motor               | -0.042              | 0.270* | -0.07 | 0.039   | 0.271*  | 0.383** |
| Social emotional    | -0.107              | 0.220  | 0.146 | 0.110   | 0.248   | 0.141   |
| Adaptive behavioral | 0.184               | 0.298* | 0.119 | 0.158   | 0.274*  | 0.148   |

\* $p < 0.05$ , \*\* $p < 0.01$ , \*\*\* $p < 0.001$ .

**Table S5.** OCP levels in breast milk in different countries.

| Country  | Calendar Period  | Measured Compound  | Pesticide Level     | Reference            |
|----------|------------------|--------------------|---------------------|----------------------|
| Taiwan   | 2000–2001        | Aldrin             | <LOD                | Chao et al. (2006)   |
|          |                  | Dieldrin           | <LOD                |                      |
|          |                  | Endrin             | <LOD                |                      |
|          |                  | $\beta$ -HCH       | 1.2 ng/g lipid      |                      |
|          |                  | $\gamma$ -HCH      | 0.8 ng/g lipid      |                      |
|          |                  | $\alpha$ -CHL      | 7.4 ng/g lipid      |                      |
|          |                  | Heptachlor         | 2.3 ng/g lipid      |                      |
|          |                  | Heptachlor epoxide | 4.0 ng/g lipid      |                      |
|          |                  | p,p'-DDT           | 19 ng/g lipid       |                      |
|          |                  | p,p'-DDE           | 228 ng/g lipid      |                      |
| Thailand | 1998             | Heptachlor         | 4.3 ng/mL           | Stuetz et al. (2001) |
|          |                  | Heptachlor epoxide | 4.4 ng/mL           |                      |
|          |                  | $\gamma$ -HCH      | 3.6 ng/mL           |                      |
|          |                  | p,p'-DDT           | 69.4 ng/mL          |                      |
|          |                  | p,p'-DDE           | 169.4 ng/mL         |                      |
|          |                  | p,p'-DDD           | 6.8 ng/mL           |                      |
| China    | 1999–2000        | p,p'-DDT           | 0.70 $\mu$ g /g fat | Wong et al. (2002)   |
|          |                  | p,p'-DDE           | 2.85 $\mu$ g/ g fat |                      |
|          |                  | $\beta$ -HCH       | 1.11 $\mu$ g/g fat  |                      |
| China    | 2003–2005        | $\alpha$ -HCH      | 76.16 ng/g lipid    | Zhao et al. (2007)   |
|          |                  | $\gamma$ -HCH      | 16.67 ng/g lipid    |                      |
|          |                  | $\beta$ -HCH       | 214.33 ng/g lipid   |                      |
|          |                  | p,p'-DDE           | 1528.20 ng/g lipid  |                      |
| China    | 2006, 2008, 2010 | $\alpha$ -HCH      | <LOD                | Zhou et al. (2012)   |
|          |                  | $\beta$ -HCH       | 67.1 ng/g lipid     |                      |
|          |                  | $\gamma$ -HCH      | <LOD                |                      |
|          |                  | $\delta$ -HCH      | >LOD                |                      |
|          |                  | HCB                | 25.5 ng/g lipid     |                      |
|          |                  | 2,4'-DDE           | <LOD                |                      |

|                                 |                                 |                    |                         |                                |
|---------------------------------|---------------------------------|--------------------|-------------------------|--------------------------------|
|                                 |                                 | 4,4'-DDE           | <LOD                    |                                |
|                                 |                                 | 2,4'-DDD           | <LOD                    |                                |
|                                 |                                 | 4,4'-DDD           | 10.5 ng/g lipid         |                                |
| Vietnam                         | 2000–2001                       | p,p'-DDT           | 34–6900 ng/g lipid wt   | Minh et al. (2004)             |
|                                 |                                 | p,p'-DDE           | 420–6300 ng/g lipid wt  |                                |
|                                 |                                 | p,p'-DDD           | 3–50 ng/g lipid wt      |                                |
|                                 |                                 | $\beta$ -HCH       | 11–160 ng/g lipid wt    |                                |
| Korea                           | 2011                            | p,p'-DDT           | 91.7 ng/g lipid wt      | Lee et al. (2013)              |
|                                 |                                 | p,p'-DDE           | 0.94 ng/g lipid wt      |                                |
|                                 |                                 | p,p'-DDD           | 6.51 ng/g lipid wt      |                                |
|                                 |                                 | $\beta$ -HCH       | 20.5 ng/g lipid wt      |                                |
|                                 |                                 | Heptachlor epoxide | 2.22 ng/g lipid wt      |                                |
| USA,<br>MEXICO<br>and RUSSIA    | 1999, 2002,<br>2007, 2009, 2011 | HCB                | 0.80–3.00 ng/g lipid wt | Mannetje et al. (2012)         |
|                                 |                                 | $\beta$ -HCH       | 0.51–2.57 ng/g lipid wt |                                |
|                                 |                                 | p,p'-DDT           | 0.42–1.41 ng/g lipid wt |                                |
|                                 |                                 | p,p'-DDE           | 0.56–1.40 ng/g lipid wt |                                |
| USA                             | 2004                            | p,p'-DDT           | <0.6 ng/g lipid wt      | Johnson-Restrepo et al. (2007) |
|                                 |                                 | p,p'-DDE           | 35.3ng/lipid wt         |                                |
|                                 |                                 | p,p'-DDD           | 2.7 ng/lipid wt         |                                |
|                                 |                                 | $\alpha$ -HCH      | 1.4 ng/g lipid wt       |                                |
|                                 |                                 | $\beta$ -HCH       | 4.4 ng/g lipid wt       |                                |
|                                 |                                 | $\gamma$ -HCH      | 5.1 ng/g lipid wt       |                                |
|                                 |                                 | $\delta$ -HCH      | <1.6 ng/g lipid wt      |                                |
| Russia                          | 1997–2009                       | HCB                | 29 ng/g lipid           | Mamontova et al. (2017)        |
|                                 |                                 | $\alpha$ -HCH      | 3.1 ng/g lipid          |                                |
|                                 |                                 | $\gamma$ -HCH      | 0.56 ng/g lipid         |                                |
|                                 |                                 | p,p'-DDT           | 32 ng/g lipid           |                                |
|                                 |                                 | p,p'-DDE           | 491ng/lipid             |                                |
|                                 |                                 | p,p'-DDD           | 1.9 ng/lipid            |                                |
| Colombia                        | Unspecified                     | 4,4' DDE           | 126 ng/g lipid wt       | Rojas-Squella et al. (2013)    |
|                                 |                                 | 4,4' DDE           | 203 ng/g lipid wt       |                                |
| Norway                          | 2002–2006                       | p,p'-DDE           | 41 ng/g lipid wt        | Polder et al. (2009)           |
|                                 |                                 | HCB                | 11ng/g lipid wt         |                                |
|                                 |                                 | $\beta$ -HCH       | 4.7 ng/g lipid wt       |                                |
|                                 |                                 | Oxychlordane       | 2.8 ng/g lipid wt       |                                |
| Vietnam,<br>China, and<br>Japan | 2007–2008                       | p,p'-DDT           | 5.8 ng/g lipid          | Haraguchi et al. (2009)        |
|                                 |                                 | p,p'-DDE           | 160 ng/lipid            |                                |
|                                 |                                 | p,p'-DDD           | 1.4 ng/lipid            |                                |
|                                 |                                 | o,p'-DDT           | 0.84 ng/g lipid         |                                |
|                                 |                                 | Oxychlordane       | 3.7 ng/g lipid          |                                |
|                                 |                                 | $\beta$ -HCH       | 140 ng/g lipid          |                                |
|                                 |                                 | HCB                | 13 ng/g lipid           |                                |

MDL: method detection limit. <sup>a</sup>  $\Sigma$ HCH is the sum of  $\alpha$ ,  $\beta$ ,  $\gamma$ , and  $\delta$ - HCH;  $\Sigma$ CHL is the sum of cis- and trans-CHL;  $\Sigma$ DDT is the sum of 4,4'-DDD, 4,4'-DDE, and 4,4'-DDT;  $\Sigma$ Endosulfan is the sum of endosulfan I, endosulfan II, and endosulfan sulfate;  $\Sigma$ Endrin is the sum of endrin, endrin aldehyde, and endrin ketone;  $\Sigma$ Heptachlor is the sum of heptachlor and heptachlor epoxide.

## References

1. Burrow, G.N., Fisher, D.A. and Larsen, P.R. (1994) Maternal and fetal thyroid function. *N Engl J Med* 331(16), 1072-1078.
2. Chao, H.R., Wang, S.L., Lin, T.C. and Chung, X.H. (2006) Levels of organochlorine pesticides in human milk from central Taiwan. *Chemosphere* 62(11), 1774-1785.
3. Fatemi, S.H., Halt, A.R., Realmuto, G., Earle, J., Kist, D.A., Thuras, P. and Merz, A. (2002) Purkinje cell size is reduced in cerebellum of patients with autism. *Cell Mol Neurobiol* 22(2), 171-175.
4. Haddow, J.E., Palomaki, G.E., Allan, W.C., Williams, J.R., Knight, G.J., Gagnon, J., O'Heir, C.E., Mitchell, M.L., Hermos, R.J., Waisbren, S.E., Faix, J.D. and Klein, R.Z. (1999) Maternal thyroid deficiency during pregnancy and subsequent neuropsychological development of the child. *N Engl J Med* 341(8), 549-555.
5. Haraguchi, K., Koizumi, A., Inoue, K., Harada, K.H., Hitomi, T., Minata, M., Tanabe, M., Kato, Y., Nishimura, E., Yamamoto, Y., Watanabe, T., Takenaka, K., Uehara, S., Yang, H.R., Kim, M.Y., Moon, C.S., Kim, H.S., Wang, P., Liu, A. and Hung, N.N. (2009) Levels and regional trends of persistent organochlorines and polybrominated diphenyl ethers in Asian breast milk demonstrate POPs signatures unique to individual countries. *Environ Int* 35(7), 1072-1079.
6. Henrichs, J., Bongers-Schokking, J.J., Schenk, J.J., Ghassabian, A., Schmidt, H.G., Visser, T.J., Hooijkaas, H., de Muinck Keizer-Schrama, S.M., Hofman, A., Jaddoe, V.V., Visser, W., Steegers, E.A., Verhulst, F.C., de Rijke, Y.B. and Tiemeier, H. (2010) Maternal thyroid function during early pregnancy and cognitive functioning in early childhood: the generation R study. *J Clin Endocrinol Metab* 95(9), 4227-4234.
7. Johnson-Restrepo, B., Addink, R., Wong, C., Arcaro, K. and Kannan, K. (2007) Polybrominated diphenyl ethers and organochlorine pesticides in human breast milk from Massachusetts, USA. *J Environ Monit* 9(11), 1205-1212.
8. Lee, S., Kim, S., Lee, H.-K., Lee, I.-S., Park, J., Kim, H.-J., Lee, J.J., Choi, G., Choi, S., Kim, S., Kim, S.Y., Choi, K., Kim, S. and Moon, H.-B. (2013) Contamination of polychlorinated biphenyls and organochlorine pesticides in breast milk in Korea: Time-course variation, influencing factors, and exposure assessment. *Chemosphere* 93(8), 1578-1585.
9. Mamontova, E.A., Tarasova, E.N. and Mamontov, A.A. (2017) PCBs and OCPs in human milk in Eastern Siberia, Russia: Levels, temporal trends and infant exposure assessment. *Chemosphere* 178, 239-248.
10. Mannetje, A., Coakley, J., Mueller, J.F., Harden, F., Toms, L.M. and Douwes, J. (2012) Partitioning of persistent organic pollutants (POPs) between human serum and breast milk: a literature review. *Chemosphere* 89(8), 911-918.
11. Minh, N.H., Someya, M., Minh, T.B., Kunisue, T., Iwata, H., Watanabe, M., Tanabe, S., Viet, P.H. and Tuyen, B.C. (2004) Persistent organochlorine residues in human breast milk from Hanoi and Hochiminh City, Vietnam: contamination, accumulation kinetics and risk assessment for infants. *Environmental Pollution* 129(3), 431-441.
12. Pathak, A., Sinha, R.A., Mohan, V., Mitra, K. and Godbole, M.M. (2011) Maternal thyroid hormone before the onset of fetal thyroid function regulates reelin and downstream signaling cascade affecting neocortical neuronal migration. *Cereb Cortex* 21(1), 11-21.
13. Polder, A., Skaare, J.U., Skjerve, E., Loken, K.B. and Eggesbo, M. (2009) Levels of chlorinated pesticides and polychlorinated biphenyls in Norwegian breast milk (2002-2006), and factors that may predict the level of contamination. *Sci Total Environ* 407(16), 4584-4590.
14. Pop, V.J., Kuijpers, J.L., van Baar, A.L., Verkerk, G., van Son, M.M., de Vijlder, J.J., Vulsma, T., Wiersinga, W.M., Drexhage, H.A. and Vader, H.L. (1999) Low maternal free thyroxine concentrations during early pregnancy are associated with impaired psychomotor development in infancy. *Clin Endocrinol (Oxf)* 50(2), 149-155.
15. Rojas-Squella, X., Santos, L., Baumann, W., Landaeta, D., Jaimes, A., Correa, J.C., Sarmiento, O.L. and Ramos-Bonilla, J.P. (2013) Presence of organochlorine pesticides in breast milk samples from Colombian women. *Chemosphere* 91(6), 733-739.
16. Roman, G.C. (2007) Autism: transient in utero hypothyroxinemia related to maternal flavonoid ingestion during pregnancy and to other environmental antithyroid agents. *J Neurol Sci* 262(1-2), 15-26.
17. Rovet, J.F. and Hepworth, S. (2001) Attention problems in adolescents with congenital hypothyroidism: a multicomponential analysis. *J Int Neuropsychol Soc* 7(6), 734-744.

18. Shelton, J.F., Hertz-Picciotto, I. and Pessah, I.N. (2012) Tipping the balance of autism risk: potential mechanisms linking pesticides and autism. *Environmental health perspectives* 120(7), 944-951.
19. Stuetz, W., Prapamontol, T., Erhardt, J.G. and Classen, H.G. (2001) Organochlorine pesticide residues in human milk of a Hmong hill tribe living in Northern Thailand. *Sci Total Environ* 273(1-3), 53-60.
20. Wegiel, J., Kuchna, I., Nowicki, K., Imaki, H., Wegiel, J., Marchi, E., Ma, S.Y., Chauhan, A., Chauhan, V., Bobrowicz, T.W., de Leon, M., Louis, L.A., Cohen, I.L., London, E., Brown, W.T. and Wisniewski, T. (2010) The neuropathology of autism: defects of neurogenesis and neuronal migration, and dysplastic changes. *Acta Neuropathol* 119(6), 755-770.
21. Wong, C.K., Leung, K.M., Poon, B.H., Lan, C.Y. and Wong, M.H. (2002) Organochlorine hydrocarbons in human breast milk collected in Hong Kong and Guangzhou. *Arch Environ Contam Toxicol* 43(3), 364-372.
22. Zhao, G., Xu, Y., Li, W., Han, G. and Ling, B. (2007) PCBs and OCPs in human milk and selected foods from Luqiao and Pingqiao in Zhejiang, China. *Sci Total Environ* 378(3), 281-292.
23. Zhou, J., Zeng, X., Zheng, K., Zhu, X., Ma, L., Xu, Q., Zhang, X., Yu, Y., Sheng, G. and Fu, J. (2012) Musks and organochlorine pesticides in breast milk from Shanghai, China: levels, temporal trends and exposure assessment. *Ecotoxicol Environ Saf* 84, 325-333.
24. Zimmermann, M.B. (2007) The adverse effects of mild-to-moderate iodine deficiency during pregnancy and childhood: a review. *Thyroid* 17(9), 829-835.
